# Supplementary material for: Field-based observations of regional-scale, temporal variation in net primary production in Tibetan alpine grasslands
Source: Copernicus journal article supplement (doi:10.5194/bg-11-2003-2014), 2014-04-09
Supplement: Supplementary file 1 [file bg-11-2003-2014-supplement.pdf]

## Supplementary Material

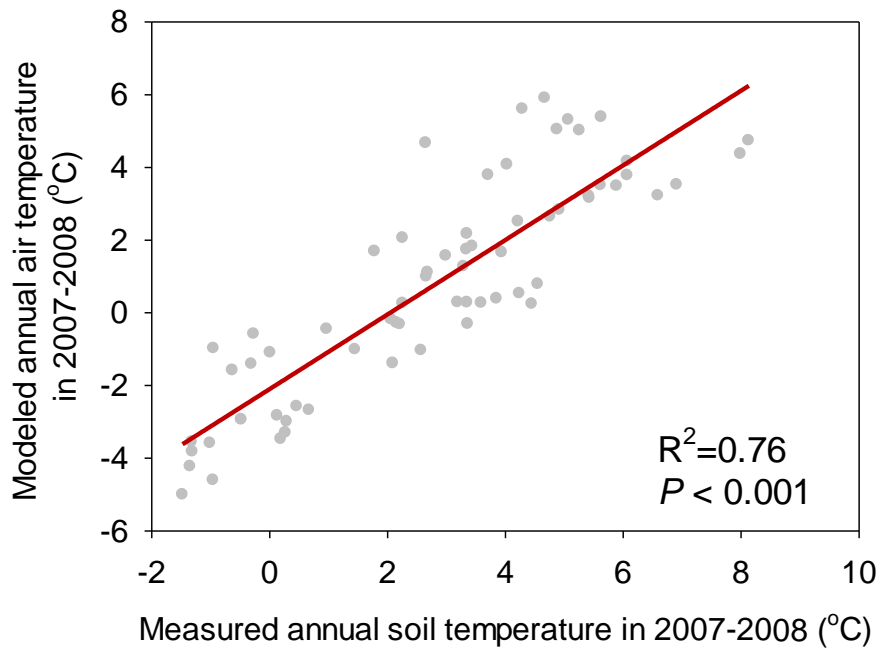

Figure S1. Comparisons between the measured annual soil temperature at 10 cm soil depth at 33 sites and modeled annual air temperature in 2007 and 2008.
